# Supplementary material for: Missed Insulin Boluses for Snacks in Youth With Type 1 Diabetes
Source: PubMed Central journal article supplement — Diabetes Care. 2009 Dec 23;33(3):507–8. doi: 10.2337/dc09-1840 (PMC2827497; doi:10.2337/dc09-1840), 2009-12-23
Supplement: supp_dc09-1840_dc09-1840_online_appendix.pdf [file supp_dc09-1840_dc09-1840_online_appendix.pdf]

**Appendix: Statistical Comparison of Glycemic Excursions Between Bolused and Unbolused Snacks Between 1300-1700 hours Using Mixed Model Regression**

|                                                 | <b>Covariate</b>     | <b>Ratio of Covariate Effect *</b><br>Point estimate (95% CI) | <b>p-value**</b> |
|-------------------------------------------------|----------------------|---------------------------------------------------------------|------------------|
| <b>Area Under the Curve &gt;180 (mg/dL•min)</b> | Unbolused/Bolused    | 2.13 (1.68, 2.71)                                             | <0.001           |
|                                                 | Age                  | 1.00 (0.98, 1.02)                                             | 1.0              |
|                                                 | Sex (female vs male) | 0.79 (0.56, 1.10)                                             | 0.4956           |
| <b>Average Rate of Change (mg/dL/min)</b>       | Unbolused/Bolused    | 1.23 (1.09, 1.39)                                             | 0.0048           |
|                                                 | Age                  | 1.00 (0.99, 1.01)                                             | 1.0              |
|                                                 | Sex (female vs male) | 0.95 (1.14, 0.79)                                             | 1.0              |
| <b>Δ Glucose (mg/dL)</b>                        | Unbolused/Bolused    | 2.13 (1.82, 2.49)                                             | <0.001           |
|                                                 | Age                  | 0.99 (0.98,1.00)                                              | 0.0786           |
|                                                 | Sex (female vs male) | 0.76 (0.66, 0.86)                                             | <0.001           |

\* Parameter estimates and confidence intervals are back-transformed to original units of measurement.

\*\* P-values are Bonferonni adjusted for multiple tests on 3 outcome variables.
